# Supplementary material for: Thymic iNKT single cell analyses unmask the common developmental program of mouse innate T cells
Source: PubMed Central journal article supplement (PMC7721697; doi:10.1038/s41467-020-20073-8), 2020-12-07
Supplement: 41467_2020_20073_MOESM1_ESM.pdf [file 41467_2020_20073_MOESM1_ESM.pdf]

## Supplementary Information

### **Thymic iNKT cells single cell analyses unmask the common developmental program of mouse innate T cells**

S. Harsha Krovi<sup>1</sup>, Jingjing Zhang<sup>1</sup>, Mary Jessamine Michaels-Foster<sup>1</sup>, Tonya Brunetti<sup>1</sup>, Liyen Loh<sup>1</sup>, James Scott-Browne<sup>1, 2</sup> and Laurent Gapin<sup>1, 2</sup>

<sup>1</sup> Department of Immunology and Microbiology, University of Colorado Anschutz Medical Campus, Aurora, CO, USA.

<sup>2</sup> Department of Biomedical Research, and Department of Pediatrics, National Jewish Health, Denver, CO, USA.

a) Monocle 3

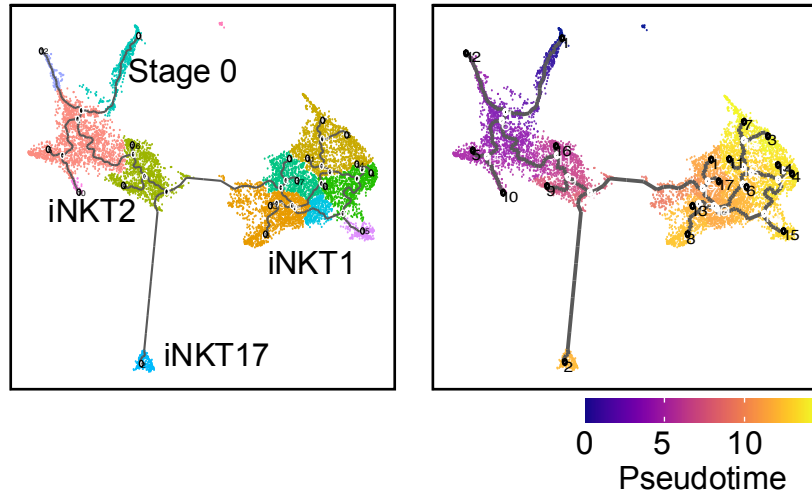

b) Slingshot

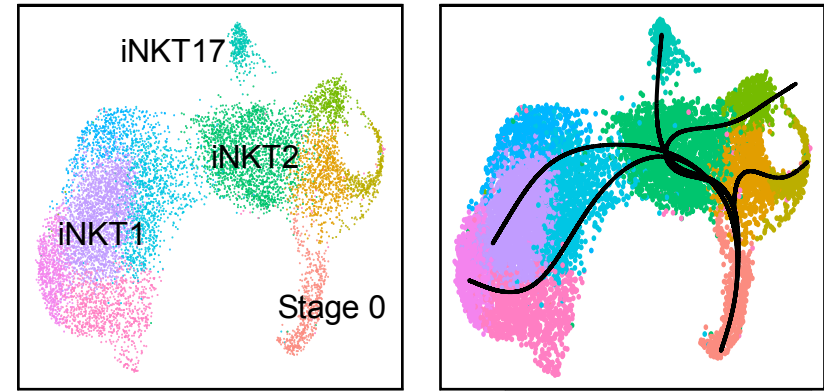

**Supplementary Figure 1. Developmental trajectories of thymic iNKT cells.** (a) Pseudotemporal trajectory was computed using the Monocle3 trajectory inference R package and displayed on a UMAP plot. Cells are colored by both cluster identity and along their computed pseudotime values. (b) Pseudotemporal trajectories computed using the Slingshot trajectory inference R package on a UMAP plot. Cells in cluster 0 were provided as the root node for both softwares since those cells represent the earliest iNKT cell precursors. The softwares then determine the differentiation paths that the stage 0 cells could take based on gene expression.

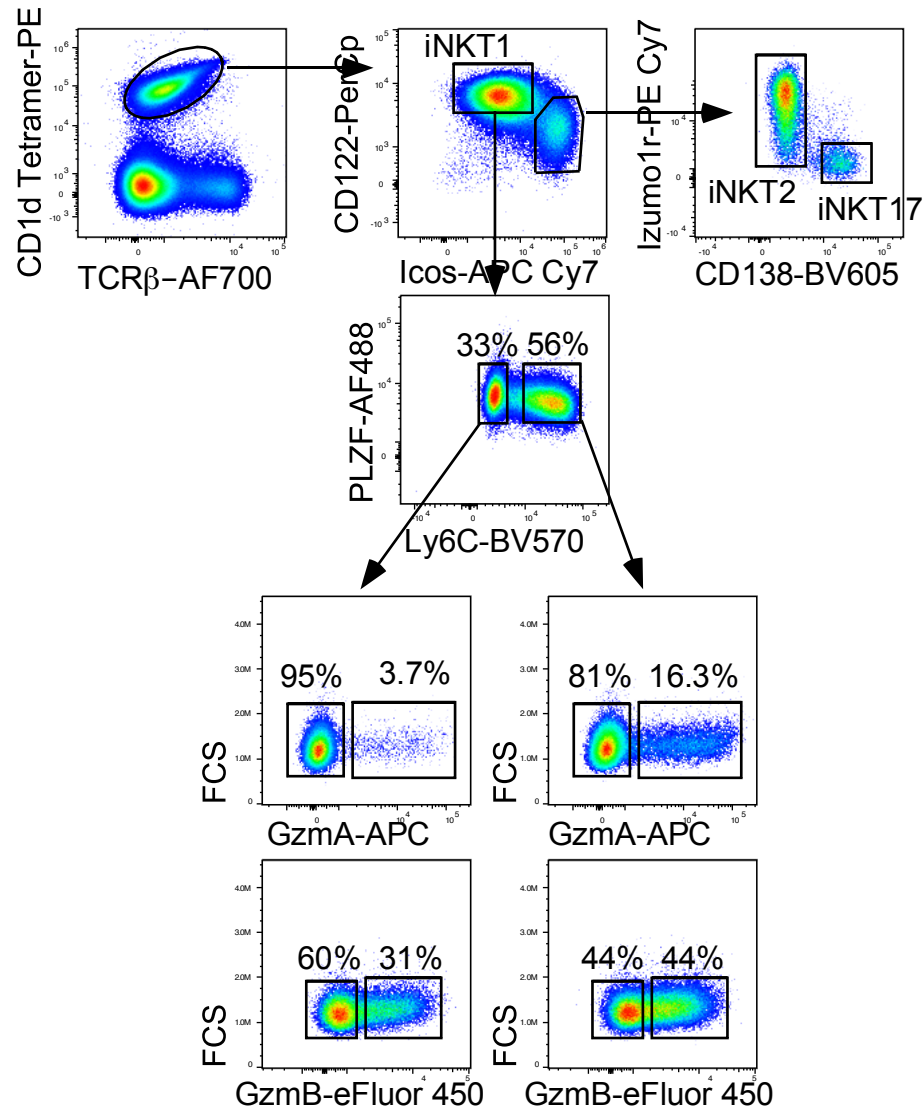

**Supplementary Figure 2. Thymic Ly6C<sup>+</sup> iNKT1 cells express higher amounts of GZMA and GZMB proteins than Ly6C<sup>-</sup> iNKT1 cells.** Representative flow cytometry plots depicting the gating strategy used to identify the various iNKT cell subsets in the thymus of 8-week-old C57BL/6 mice using the cell surface markers CD122, ICOS, Izumo1r and CD138. iNKT1 cells were subsequently separated based on Ly6C expression and expression of both GZMA and GZMB proteins in Ly6C<sup>-</sup> and Ly6C<sup>+</sup> iNKT1 are depicted. Data are representative of 2 independent experiments with similar results.

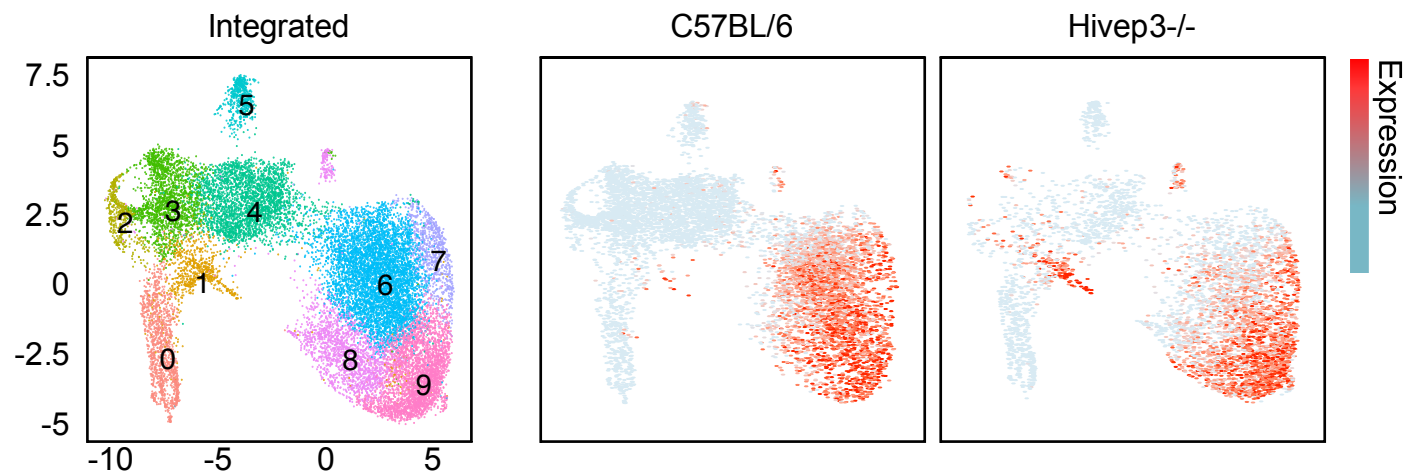

**Supplementary Figure 3. *Hivep3*<sup>-/-</sup> cluster 1 cells possess a mature iNKT1 gene signature.** Expression of selected iNKT1 gene signature (*Cd7*, *Dusp1*, *Ms4a4b*, *Il2rb*, *Fcer1g*, *Khdc2*, *Klra1*, *Klf2*, *Klrb1a*, *Cd160* and *S100a4*) in the C57BL/6 and *Hivep3*<sup>-/-</sup> single cell RNA-seq samples. Each dot represents one cell and gene expression is plotted along a colorimetric gradient, with red corresponding to high expression.

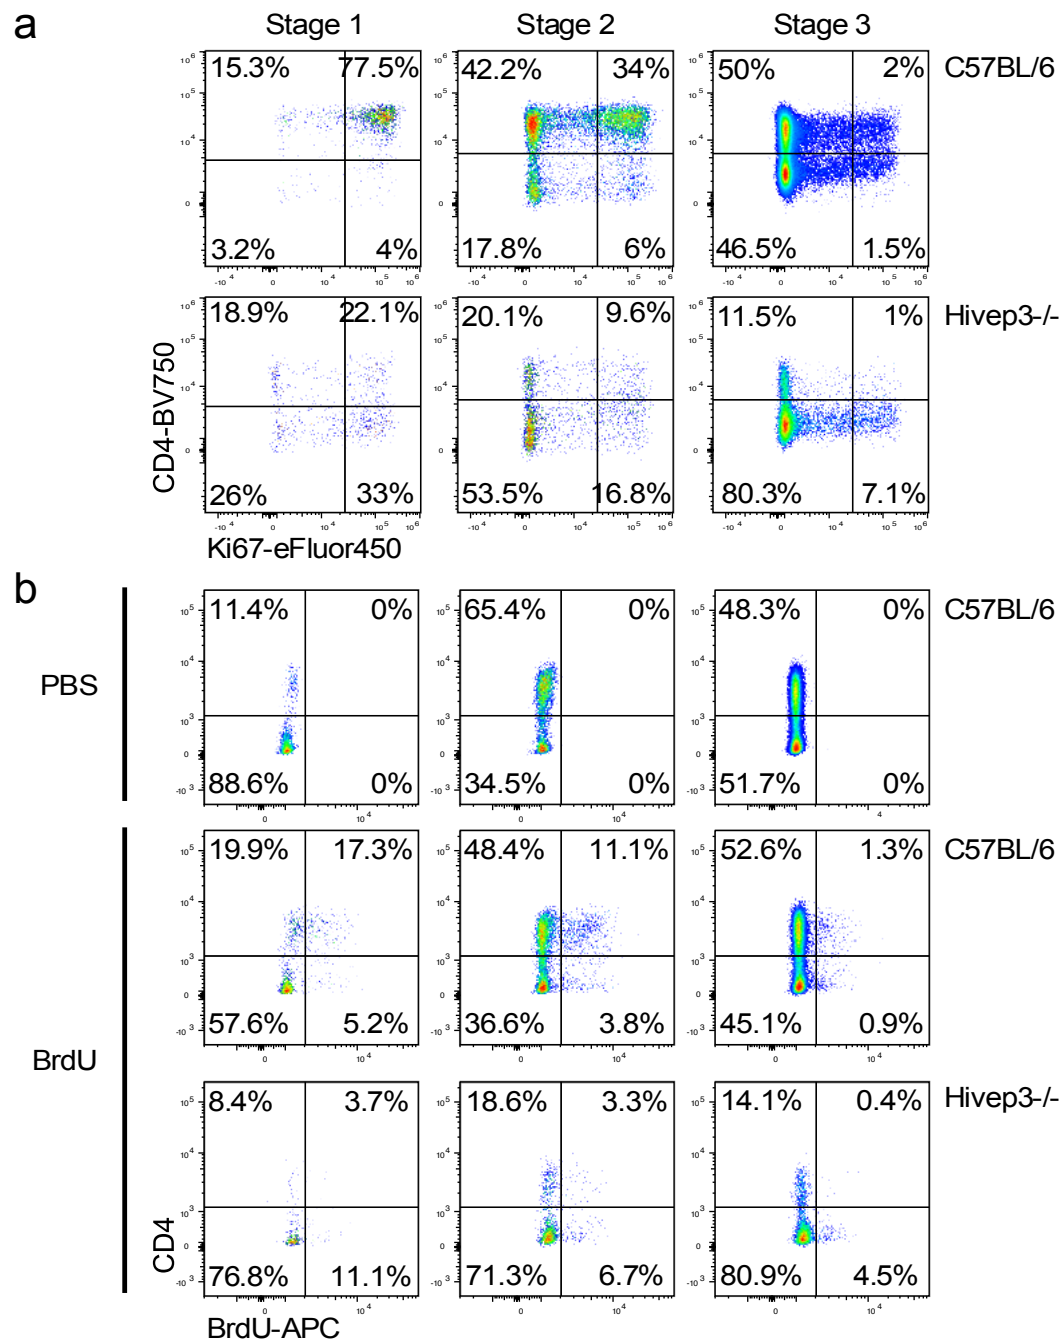

**Supplementary Figure 4. *Hivep3*<sup>-/-</sup> iNKT cells display a reduced proliferative potential. (a)** Representative flow cytometry plots depicting the expression of CD4 and Ki67 on the three developmental stages of iNKT cells (Stage 1, CD44<sup>+</sup>NK1.1<sup>-</sup>, stage 2, CD44<sup>+</sup>NK1.1<sup>-</sup> and stage 3, CD44<sup>+</sup>NK1.1<sup>+</sup>) in the thymi of 8-week-old C57BL/6 and *Hivep3*<sup>-/-</sup> mice. Data are representative of two independent experiments with 5-7 mice per group. 8-10 weeks old mice of both sexes were used. **(b)** Representative flow cytometry plots depicting the expression of CD4 and incorporation of BrdU by the three developmental stages of iNKT cells in the thymi of 8-week-old C57BL/6 and *Hivep3*<sup>-/-</sup> mice. Data are representative of one experiment with 3 mice per groups.

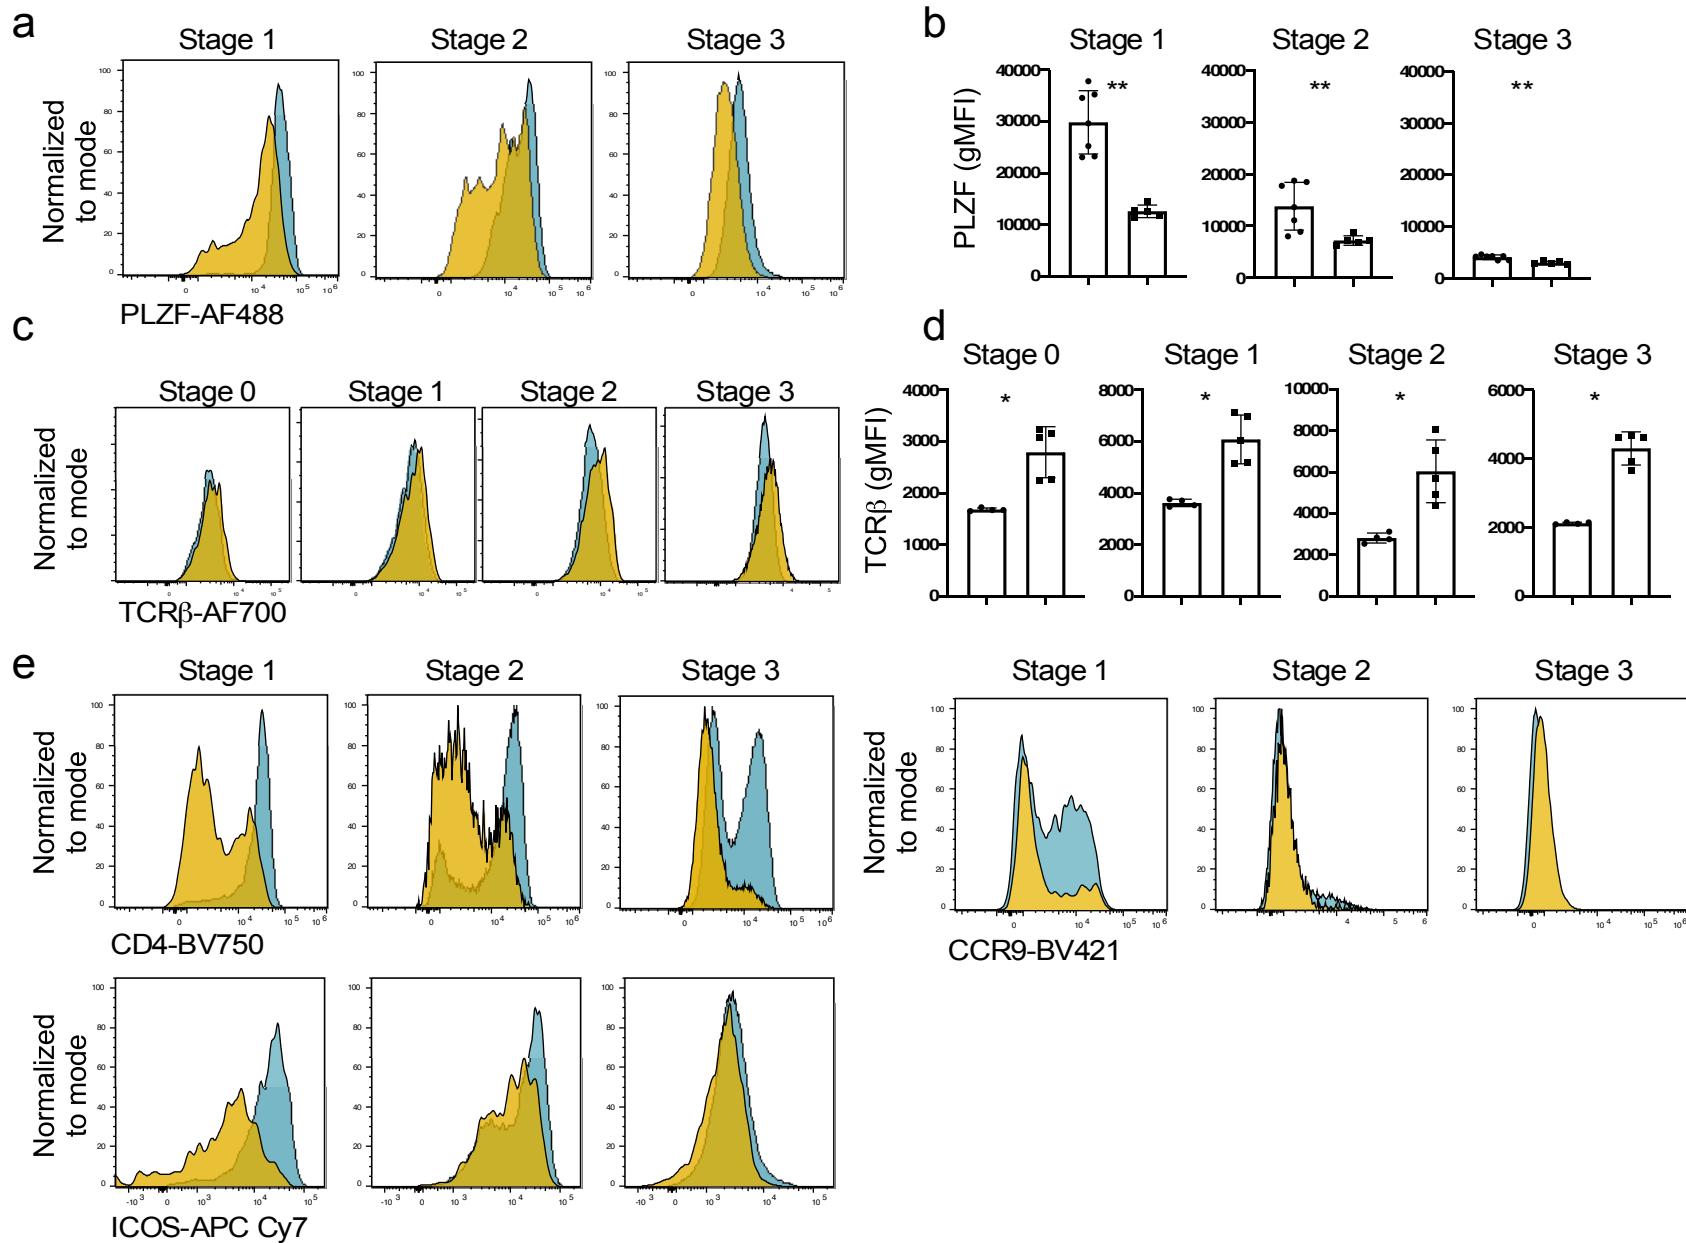

**Supplementary Figure 5. Characterizing protein expression of *Hivep3*<sup>-/-</sup> iNKT cells.** (a) Representative flow cytometry plots depicting the expression of PLZF on the three developmental stages of iNKT cells in the thymi of 8-week-old C57BL/6 and *Hivep3*<sup>-/-</sup> mice. (b) Quantification of PLZF expression (gMFI) in three different developmental stages. Stage 1  $p=0.025$ , Stage 2  $p=0.051$ , Stage 3  $p=0.025$  (c) Representative flow cytometry plots depicting the levels of expression of TCRβ by the four developmental stages of iNKT cells (Stage 0, CD24<sup>+</sup>CD44<sup>-</sup>NK1.1<sup>-</sup>, Stage 1, CD44<sup>-</sup>NK1.1<sup>-</sup>, stage 2, CD44<sup>+</sup>NK1.1<sup>-</sup> and stage 3, CD44<sup>+</sup>NK1.1<sup>+</sup>) in the thymi of 8-week-old C57BL/6 and *Hivep3*<sup>-/-</sup> mice. (d) Quantification of TCRβ expression (gMFI) in four different developmental stages. Stage 0  $p=0.0159$ , Stage 1  $p=0.0159$ , Stage 2  $p=0.0159$ , Stage 3  $p=0.0159$  (e) Representative flow cytometry plots depicting the expression of CD4, CCR9 and ICOS on the three developmental stages of iNKT cells in the thymi of 8-week-old C57BL/6 and *Hivep3*<sup>-/-</sup> mice. Data are representative of two independent experiments with a total of 6 B6 and 5 *Hivep3*<sup>-/-</sup> mice per group. Data in the figure are mean ± SD with dots representing individual values. Source data are provided as a source data file.

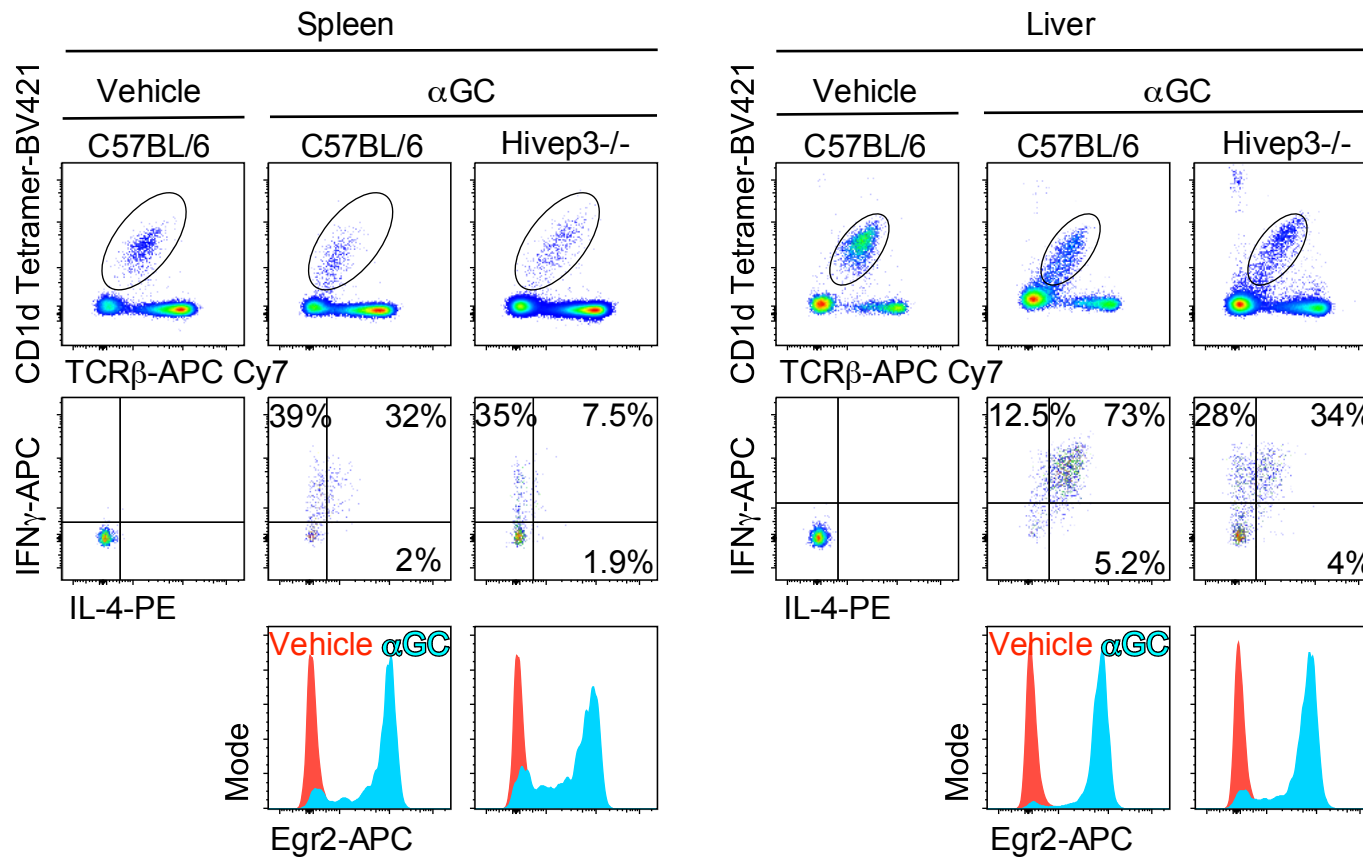

**Supplementary Figure 6. Peripheral iNKT cells in *Hivp3*<sup>-/-</sup> mice are poorly responsive.** iNKT cells from C57BL/6 and *Hivp3*<sup>-/-</sup> mice were isolated from the spleen and liver 90 minutes following i.p. administration of the agonist lipid  $\alpha$ GC and stained intracellularly for IFN $\gamma$  and IL-4. The cells were also stained for the transcription factor Egr2 (data representative of n = 3 mice per group).

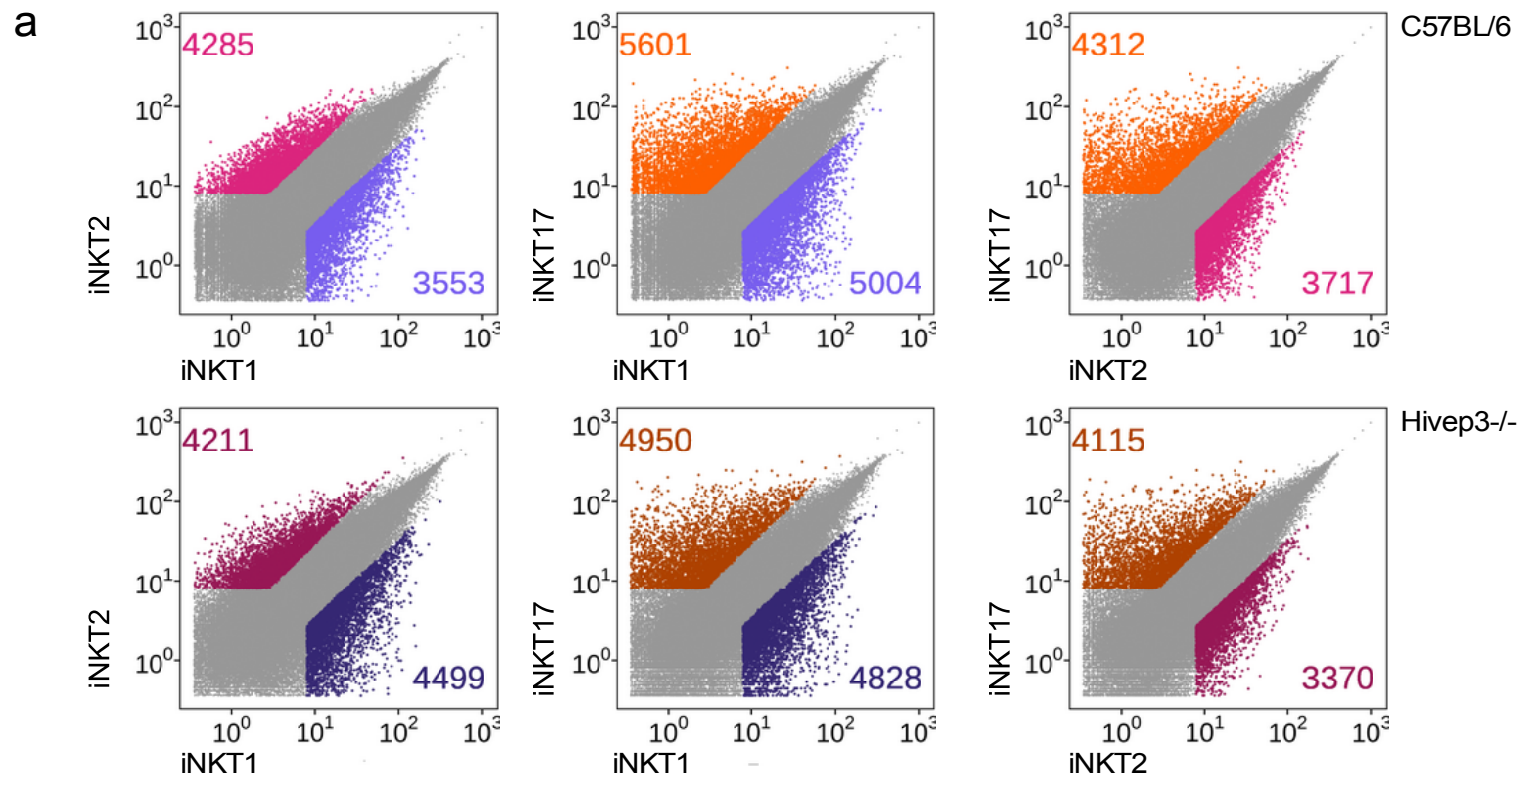

**b**

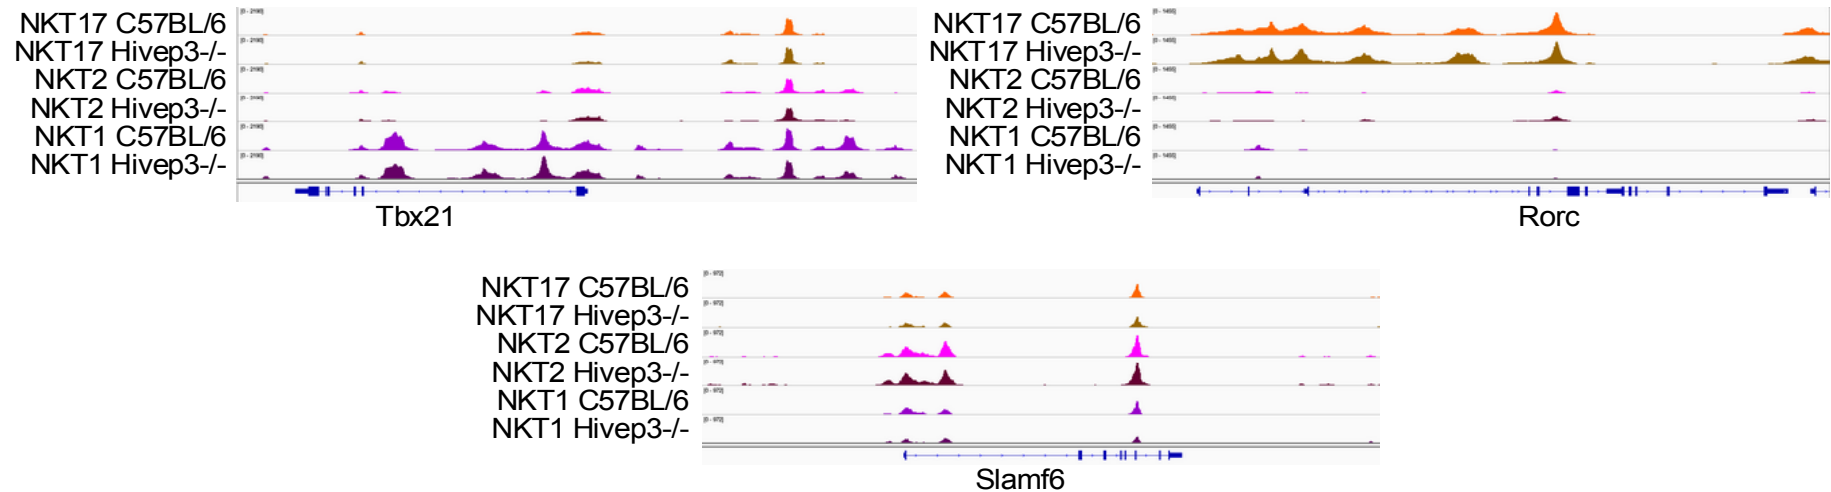

**Supplementary Figure 7. Genome-wide chromatin landscapes readily identify iNKT subsets in both C57BL/6 and *Hivp3*<sup>-/-</sup> mice.** (a) Scatterplots of mean ATAC-seq counts per peak comparing iNKT1, iNKT2 and iNKT17 subsets from C57BL/6 (top) or *Hivp3*<sup>-/-</sup> (bottom) mice. Pairwise contrasts were performed with limma and differentially accessible regions (colored) were filtered based on an FDR adjusted p-value of less than 0.1 and an estimated fold-change of at least 3. (b) Mean ATAC-seq coverage at the *Tbx21*, *Rorc* and *Slamf6* loci for ATAC-Seq tracks.



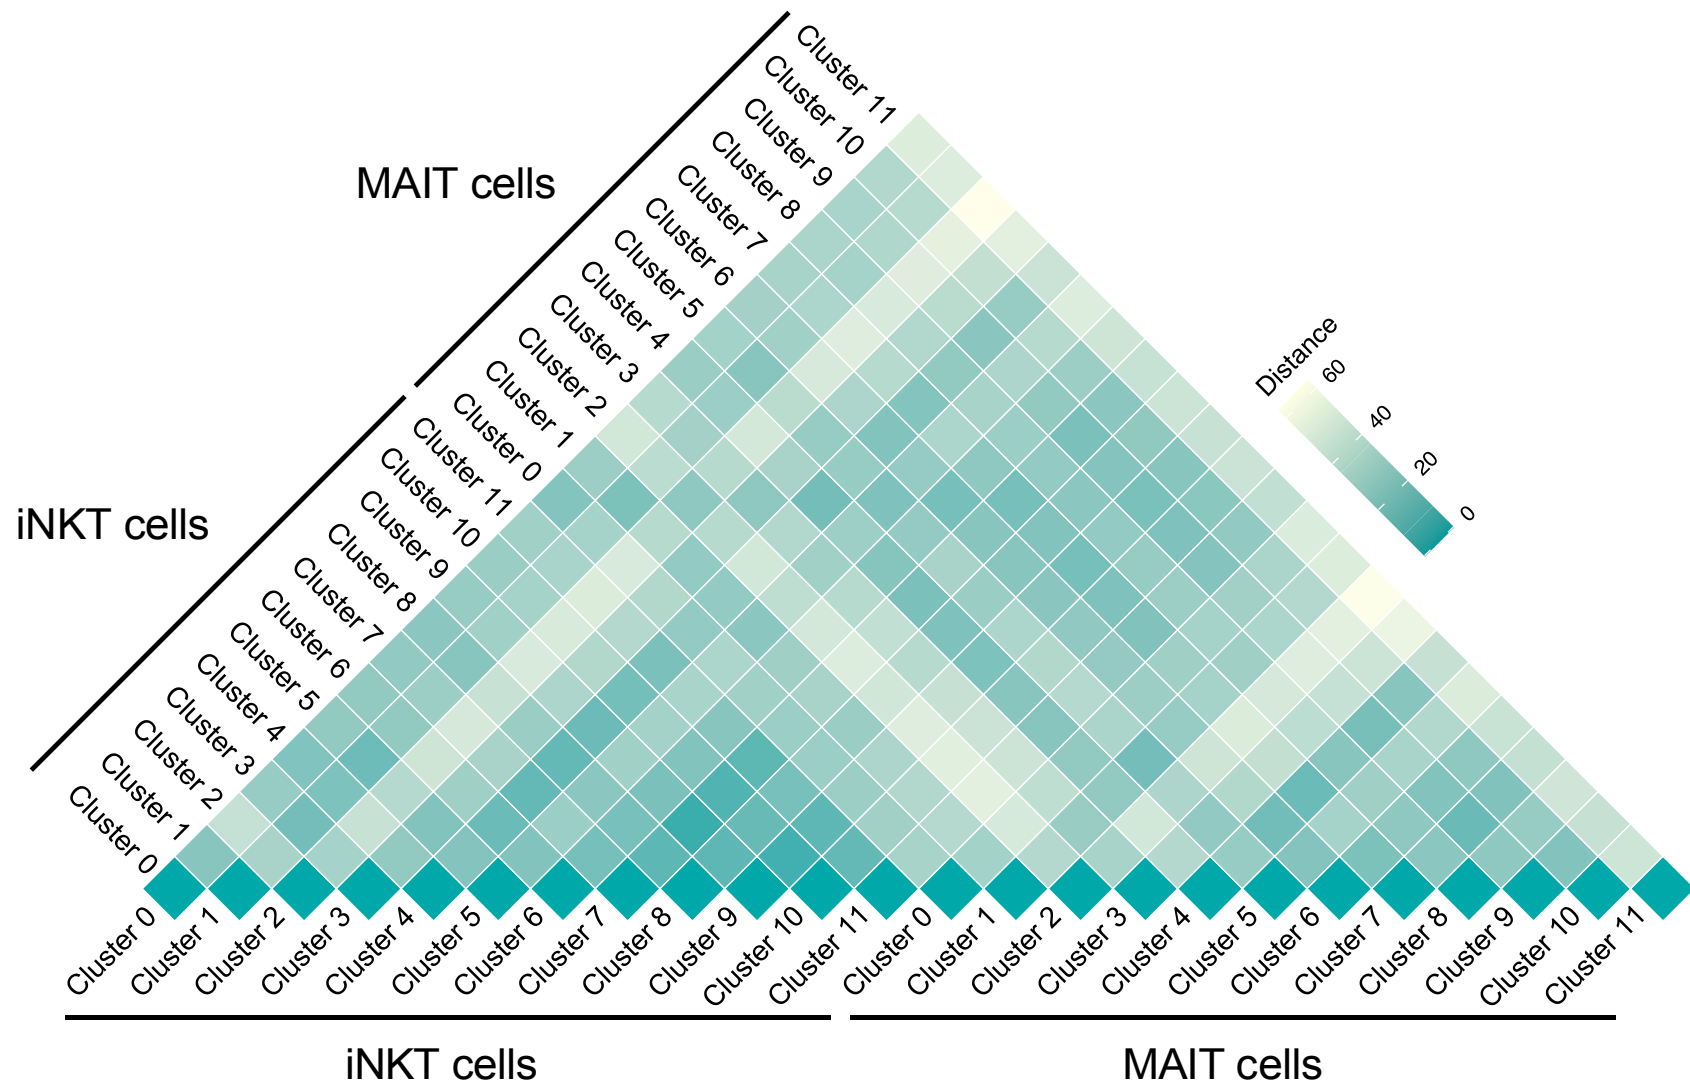

**Supplementary Figure 8. iNKT and MAIT cells belonging to the same cluster possess greater transcriptional similarity to each other than to cells in other clusters.** Average expression of all genes in cells belonging to a given cluster was used to calculate pairwise Euclidean distances across both iNKT and MAIT cells in all clusters. The distances were then plotted as a heatmap, with a darker shade corresponding to greater similarity between two groups.

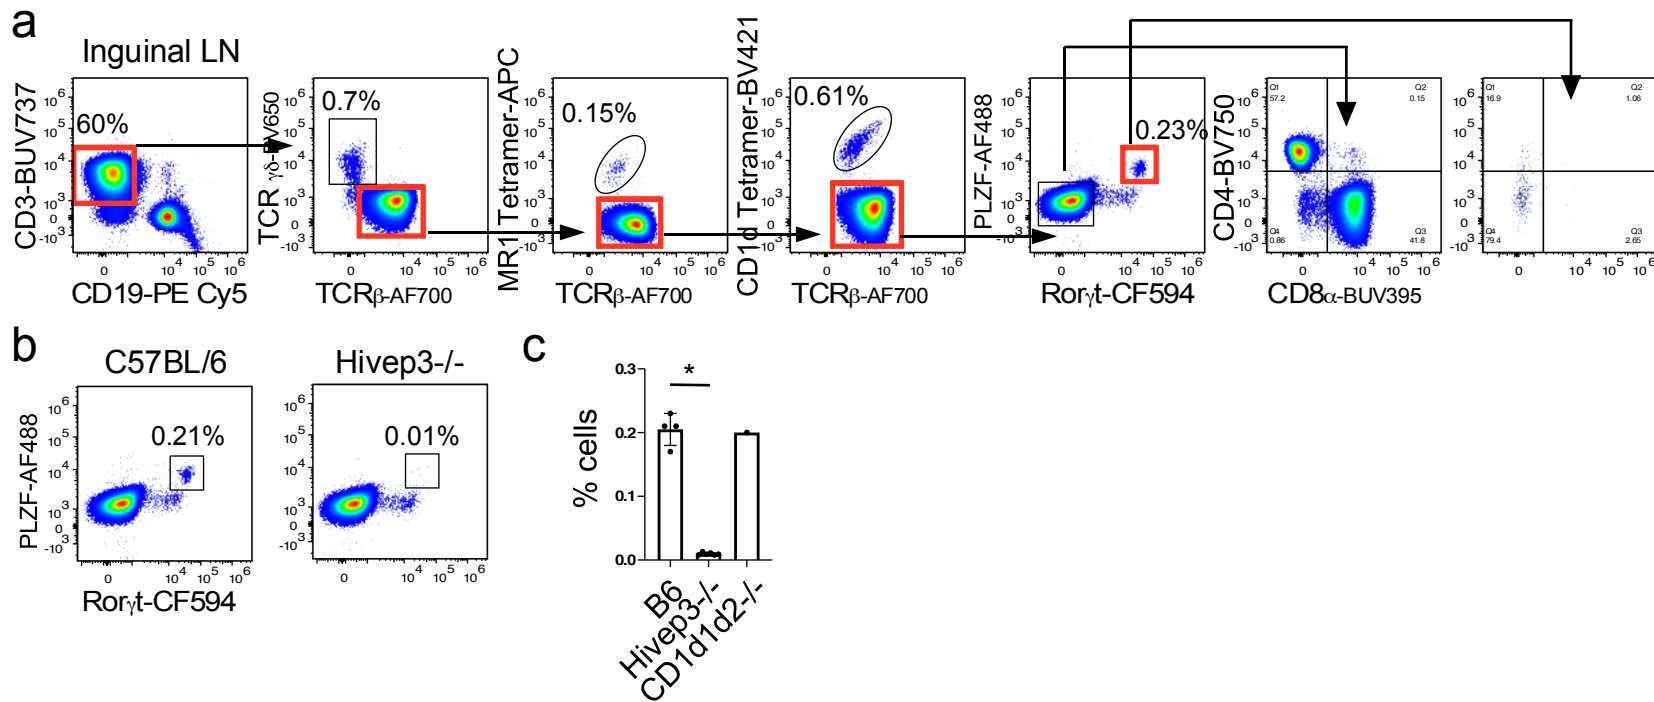

**Supplementary Figure 9. Identification of CD4<sup>+</sup>CD8<sup>-</sup> TCR $\beta$ <sup>+</sup> T cell population that co-express PLZF and Ror $\gamma$ t in the inguinal lymph nodes of mice.** (a) Gating strategy used to identify non-iNKT, non-MAIT,  $\alpha\beta$  T cells with co-expression of PLZF and Ror $\gamma$ t. (b) Representative analysis of PLZF and Ror $\gamma$ t expression in non-iNKT, non-MAIT  $\alpha\beta$  T cells in the inguinal lymph nodes of C57BL/6 and *Hivep3*<sup>-/-</sup> mice. (c) Quantified proportions of PLZF<sup>+</sup> Ror $\gamma$ t<sup>+</sup> non-iNKT, non-MAIT  $\alpha\beta$  T cells in the inguinal lymph nodes of C57BL/6, *Hivep3*<sup>-/-</sup> and CD1d1d2<sup>-/-</sup> mice. Data are from two independent experiments with a total of 4 C57BL/6, 5 *Hivep3*<sup>-/-</sup> and 1 CD1d1d2<sup>-/-</sup> mice with 8-10 weeks old mice of both sexes used.  $p=0.0159$  between C57BL/6 and *Hivep3*<sup>-/-</sup> using the two-tailed Mann-Whitney U test. Data are mean  $\pm$  SD with dots representing individual values. Source data are provided as a source data file.

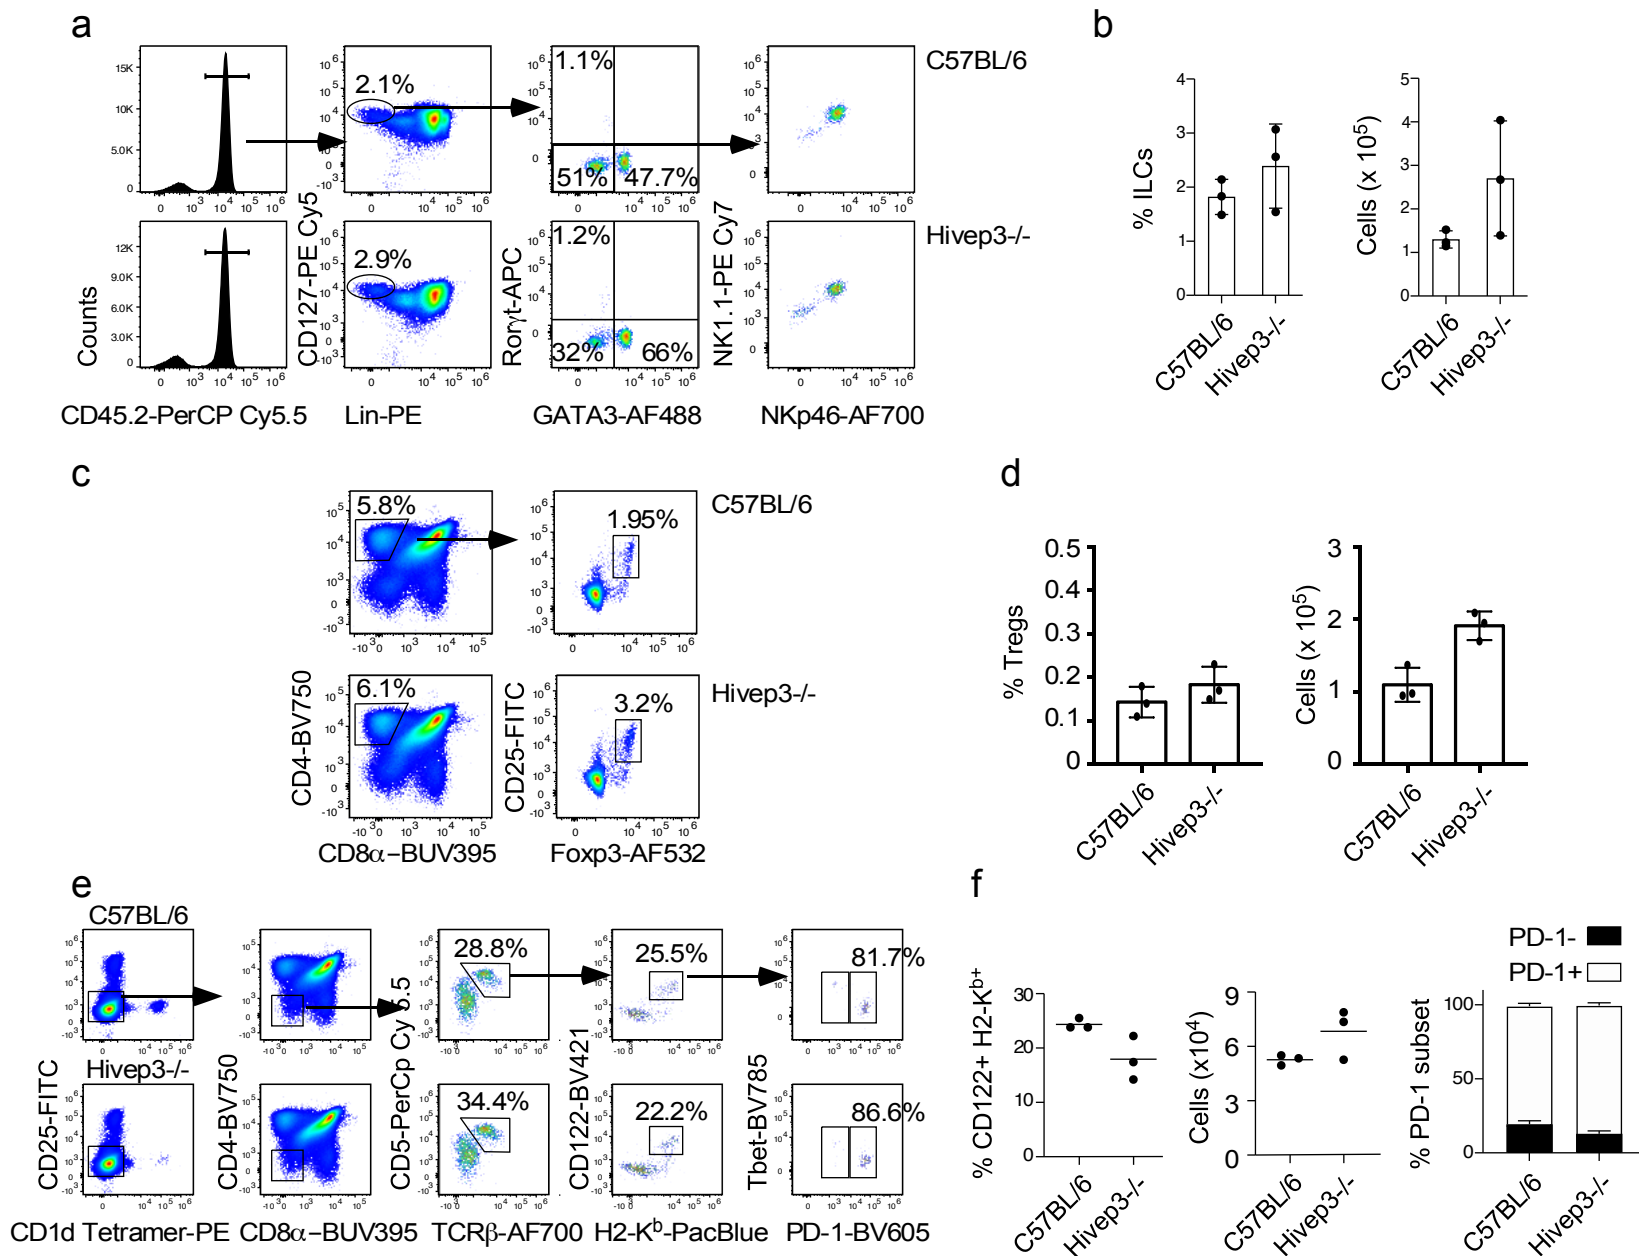

**Supplementary Figure 10. Analysis of innate lymphoid cells (ILCs), regulatory T cells and intraepithelial lymphocyte precursors in C57BL/6 and *Hivp3*<sup>-/-</sup> mice.** (a) Gating strategy used to identify and quantify the proportions of ILC populations in the lungs of C57BL/6 and *Hivp3*<sup>-/-</sup> mice. (b) Quantified proportions and total numbers of ILCs in the lungs of C57BL/6 and *Hivp3*<sup>-/-</sup> mice. (c) Gating strategy used to identify and quantify the proportions Tregs in the thymus of C57BL/6 and *Hivp3*<sup>-/-</sup> mice. (d) Quantified proportions and total numbers of Tregs in the thymus of C57BL/6 and *Hivp3*<sup>-/-</sup> mice. (e) Flow cytometry for the identification of IELp cells in the thymus. Numbers in plots indicate percent cells in outlined area. (f) summary of the frequency and number of mature CD122<sup>+</sup> H-2K<sup>b</sup><sup>+</sup> cells gated as in (e) and total PD-1<sup>+</sup> cells and PD-1<sup>-</sup> in the thymic IELp population of C57BL/6 and *Hivp3*<sup>-/-</sup> mice. Data are from one experiment with a total of 3 mice per group. Data in the figure are mean ± SD with dots representing individual values. Source data are provided as a source data file.

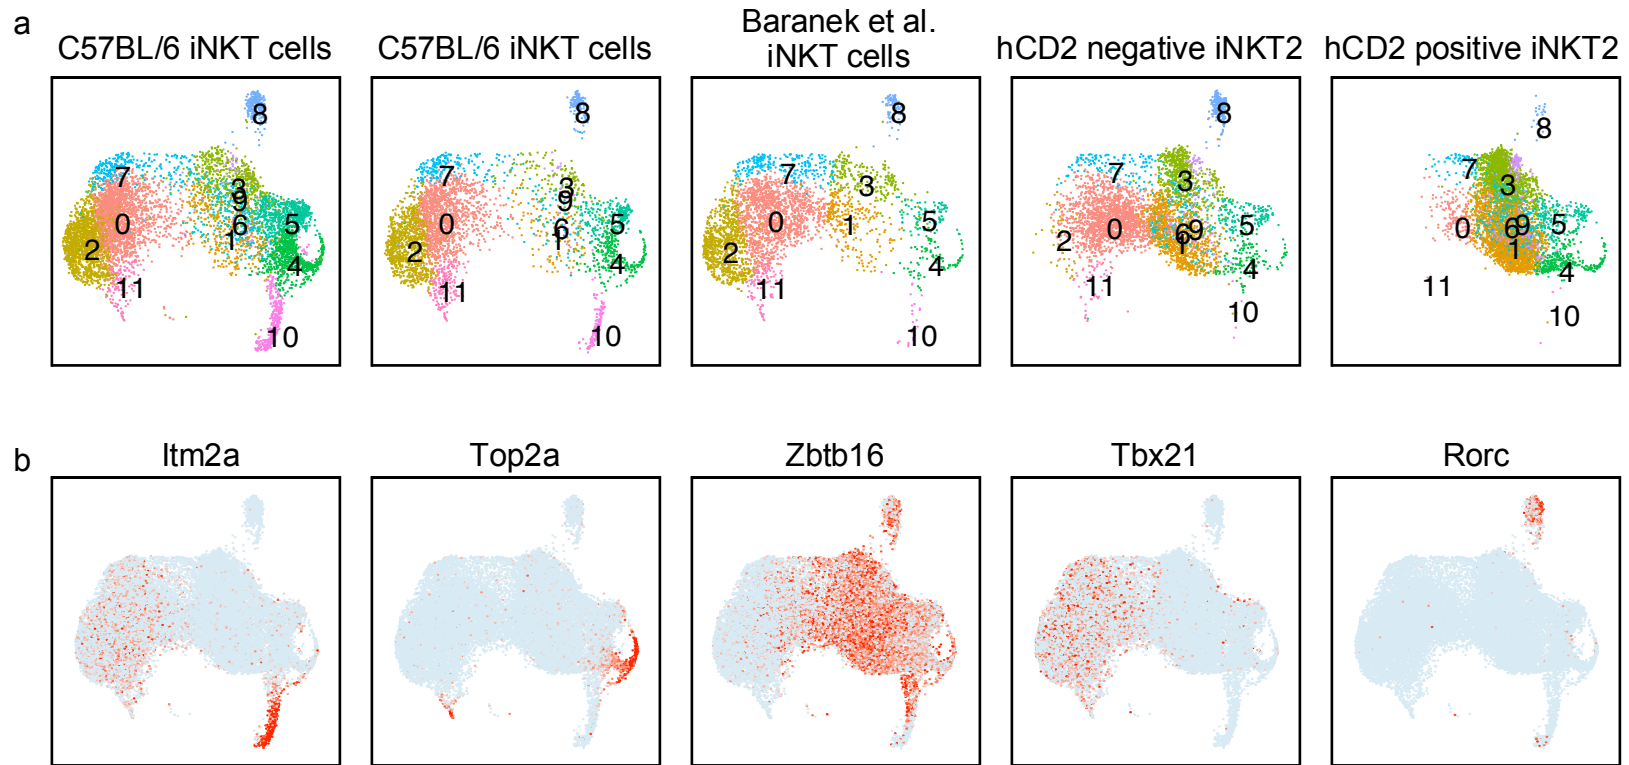

**Supplementary Figure 11. scRNA-seq analysis of steady-state C57BL/6 thymic iNKT cells.** (a) Uniform manifold approximation and projection (UMAP) of two independent scRNA-seq data sets from C57BL/6 thymic iNKT cells, C57BL/6 thymic iNKT cells from Baranek et al. (Ref 52) and from hCD2neg and hCD2pos iNKT2 cells (CD122<sup>-</sup> ICOS<sup>+</sup> CD138<sup>-</sup>) sorted from the thymus of BALB/c KN2 mice and integrated using FastMNN. (b) Expression of five typical genes used to define most common iNKT cell subsets and cycling cells.

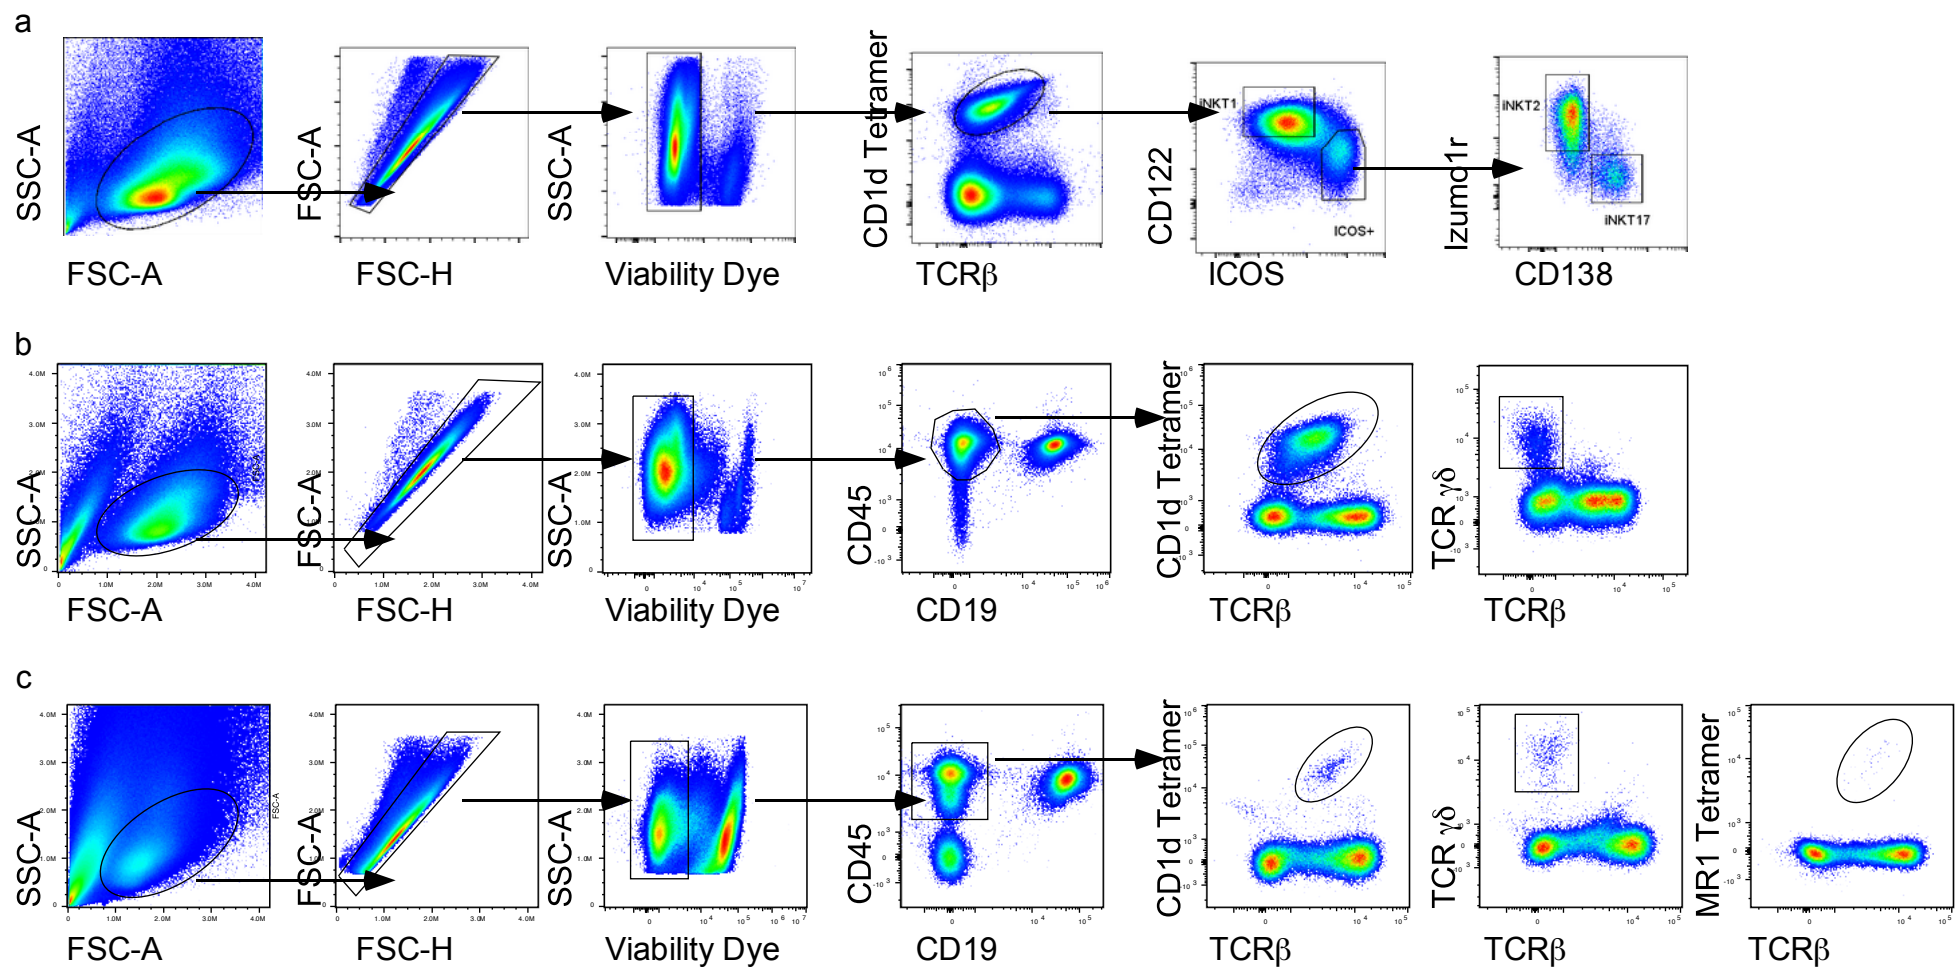

**Supplementary Figure 12. Gating strategies implemented to identify  $T_{inn}$  populations for analyses and sorting.** (a) Representative Gating strategy used for sorting thymic iNKT cell subsets submitted to ATAC-seq. (b) Representative Gating strategy in the liver (c) Representative Gating strategy in the lungs
